# Supplementary material
Source: PubMed Central journal article supplement (PMC6322869)
Supplement: supp_AC118.002127_135597_2_supp_234712_pqg1qw.pdf [file supp_AC118.002127_135597_2_supp_234712_pqg1qw.pdf]

A

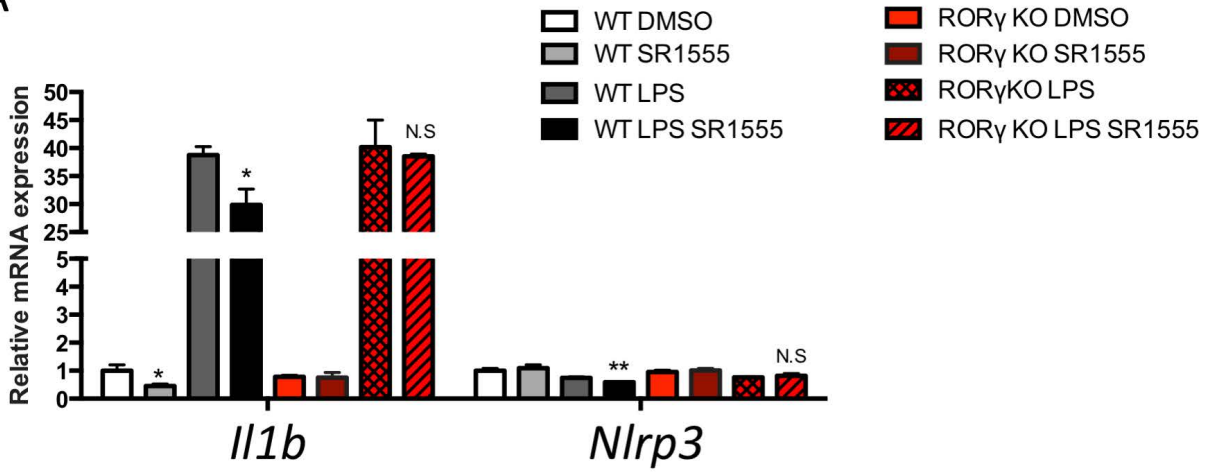

B

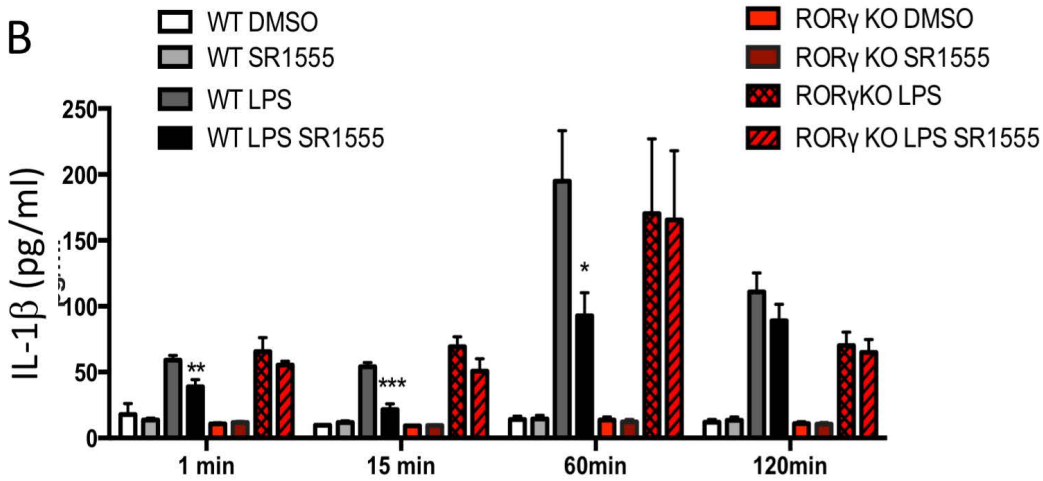

**Supplemental Figure 1.** The effect of SR1555 on the NLRP3 inflammasome requires ROR $\gamma$ . *Nlrp3* and *Il1b* gene expression (A) and IL-1 $\beta$  secretion (B) in BMDMs from WT or ROR $\gamma$  KO mice in response LPS treatment in presence or absence of SR1555(10 $\mu$ M). \*  $p < 0.05$ , \*\*  $p < 0.01$ , by Student's t test.

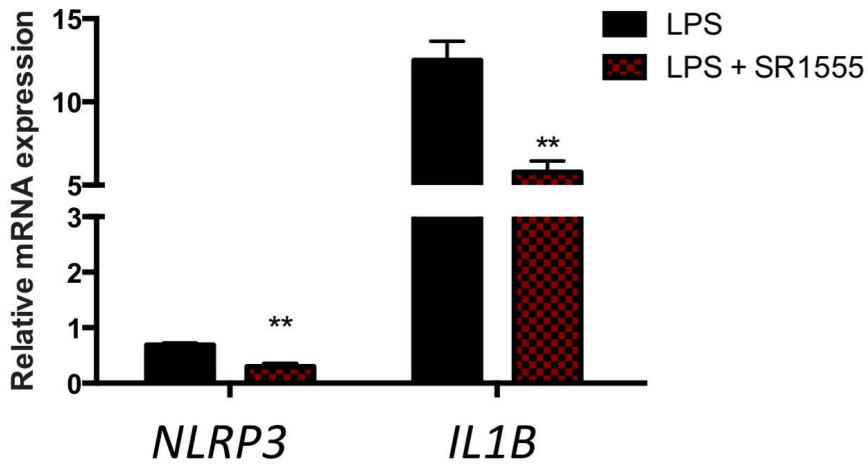

**Supplemental Figure 2.** SR1555 suppresses *NLRP3* and *IL1B* gene expression in human derived macrophages in response LPS treatment . SR1555(5 $\mu$ M). \*  $p < 0.05$ , \*\*  $p < 0.01$ , by Student's t test.
